# Supplementary material
Source: HighWire-hosted journal article supplement (https://bmjopen.bmj.com/content/13/12/e072484)
Supplement: inline-supplementary-material-1 [file inline-supplementary-material-1.pdf]

Supplemental Table 1. Some Examples of Cell-based Immunotherapy Strategies (DC) for Glioma

| Cells used                                                  | Year published | Adult/Childhood gliomas | First author        | Affiliated as                                                                                                                                                                                                                                                 | ref |
|-------------------------------------------------------------|----------------|-------------------------|---------------------|---------------------------------------------------------------------------------------------------------------------------------------------------------------------------------------------------------------------------------------------------------------|-----|
| DC cells                                                    | 2020           | adult                   | Jeremy D. Rudnick   | Department of Neurosurgery, Cedars-Sinai Medical Center, Los Angeles, CA, United States                                                                                                                                                                       | 1   |
| autologous dendritic cell vaccine                           | 2018           | adult                   | Linda M. Liau       | University of California Los Angeles (UCLA) David Geffen School of Medicine & Jonsson Comprehensive Cancer Center, Los Angeles, CA, USA                                                                                                                       | 2   |
| Dendritic cell-based immunotherapy targeting Wilms' tumor 1 | 2015           | adult                   | Keiichi Sakai       | Department of Neurosurgery, National Hospital Organization, Shinshu Ueda Medical Center, Ueda, Nagano, Japan                                                                                                                                                  | 3   |
| Intraventricular B7-H3 CAR T Cells                          | 2023           | Childhood (DIPG*)       | Nicholas A. Vitanza | Ben Towne Center for Childhood Cancer Research, Seattle Children's Research Institute, Seattle, Washington.                                                                                                                                                   | 4   |
| IL13R $\alpha$ 2 CAR T cell                                 | 2016           | Adult                   | Christine E. Brown  | Department of Hematology and Hematopoietic Cell Transplantation, T Cell Therapeutics Research Laboratory, City of Hope Beckman Research Institute and Medical Center, Duarte, CA                                                                              | 5   |
| Autologous CMV-specific T cells                             | 2020           | Adult                   | Corey Smith         | QIMR Berghofer Centre for Immunotherapy and Vaccine Development and Tumor Immunology Laboratory, Department of Immunology, QIMR Berghofer Medical Research Institute, Brisbane, Queensland, Australia. 2<br>NEWRO Foundation, Brisbane, Queensland, Australia | 6   |
| Autologous HER2 CMV bispecific CAR T cells                  | 2015           | Adult                   | Nabil Ahmed         | Department of Pediatrics, Center for Cell and Gene Therapy, Baylor College of Medicine, Houston, TX, USA                                                                                                                                                      | 7   |
| EGFRvIII CAR T Cell                                         | 2021           | Adult                   | Joseph S. Durgin    | Glioblastoma Translational Center of Excellence, The Abramson Cancer Center, Perelman School of Medicine at the University of Pennsylvania, Philadelphia, PA, United States                                                                                   | 8   |
| HER2-Specific CAR T cells                                   | 2017           | Adult                   | Nabil Ahmed         | Center for Cell and Gene Therapy, Texas Children's Hospital, Houston Methodist Hospital, Baylor College of Medicine, Houston                                                                                                                                  | 9   |
| EGFRvIII-directed CAR T cells                               | 2017           | Adult                   | DONALD M. O'ROURKE  | Department of Neurosurgery, Perelman School of Medicine at the University of Pennsylvania, Philadelphia, PA 19104, USA.                                                                                                                                       | 10  |

\* DIPG: Diffuse Intrinsic Pontine Glioma

**References:**

1. Rudnick, Jeremy D., et al. "A phase I trial of surgical resection with Gliadel Wafer placement followed by vaccination with dendritic cells pulsed with tumor lysate for patients with malignant glioma." *Journal of Clinical Neuroscience* 74 (2020): 187-193.
2. Liao, Linda M., et al. "First results on survival from a large Phase 3 clinical trial of an autologous dendritic cell vaccine in newly diagnosed glioblastoma." *Journal of translational medicine* 16.1 (2018): 1-9.
3. Sakai, Keiichi, et al. "Dendritic cell-based immunotherapy targeting Wilms' tumor 1 in patients with recurrent malignant glioma." *Journal of Neurosurgery* 123.4 (2015): 989-997.
4. Vitanza, Nicholas A., et al. "Intraventricular B7-H3 CAR T cells for diffuse intrinsic pontine glioma: preliminary first-in-human bioactivity and safety." *Cancer discovery* 13.1 (2023): 114-131.
5. Brown, Christine E., et al. "Regression of glioblastoma after chimeric antigen receptor T-cell therapy." *New England Journal of Medicine* 375.26 (2016): 2561-2569.
6. Smith, Corey, et al. "Autologous CMV-specific T cells are a safe adjuvant immunotherapy for primary glioblastoma multiforme." *The Journal of clinical investigation* 130.11 (2020): 6041-6053.
7. Ahmed, Nabil, et al. "Autologous HER2 CMV bispecific CAR T cells are safe and demonstrate clinical benefit for glioblastoma in a Phase I trial." *Journal for immunotherapy of cancer* 3 (2015): 1-1.
8. Durgin, Joseph S., et al. "Case report: prolonged survival following EGFRvIII CAR T cell treatment for recurrent glioblastoma." *Frontiers in Oncology* 11 (2021): 669071.
9. Ahmed, Nabil, et al. "HER2-specific chimeric antigen receptor-modified virus-specific T cells for progressive glioblastoma: a phase 1 dose-escalation trial." *JAMA oncology* 3.8 (2017): 1094-1101.
10. O'Rourke, Donald M., et al. "A single dose of peripherally infused EGFRvIII-directed CAR T cells mediates antigen loss and induces adaptive resistance in patients with recurrent glioblastoma." *Science translational medicine* 9.399 (2017): eaaa0984.
